# Supplementary material
Source: PubMed Central journal article supplement (PMC5040613)
Supplement: NIHMS773382-supplement-Supp_Table_1.pdf [file NIHMS773382-supplement-Supp_Table_1.pdf]

**Table 1 – Immunohistochemical reagents and methods**

| <b>Antibody</b>      | <b>Clone (Source)</b>           | <b>Dilution</b> | <b>Antigen Retrieval</b>                                                |
|----------------------|---------------------------------|-----------------|-------------------------------------------------------------------------|
| Cyclin D1            | SP4, rabbit mAb (Cell Marque)   | predilute       | Ventana uCC1                                                            |
| Epcam                | MOC-31, mouse mAb (Cell Marque) | 1:50            | Ventana uCC1                                                            |
| HEPPAR1              | OCH1E5, mouse mAb (DAKO)        | 1:500           | Ventana uCC1                                                            |
| LGR5                 | Rabbit pAb (Abcam)              | 1:50            | 20' steam in DAKO antigen retrieval buffer (reproduced on Ventana uCC1) |
| $\beta$ -catenin     | 14, mouse mAb (Ventana)         | predilute       | Ventana uCC1                                                            |
| Glutamine Synthetase | GS6, mouse mAb (Millipore)      | 1:10000         | Ventana uCC1                                                            |
